# Supplementary material
Source: PubMed Central journal article supplement (PMC2154468)

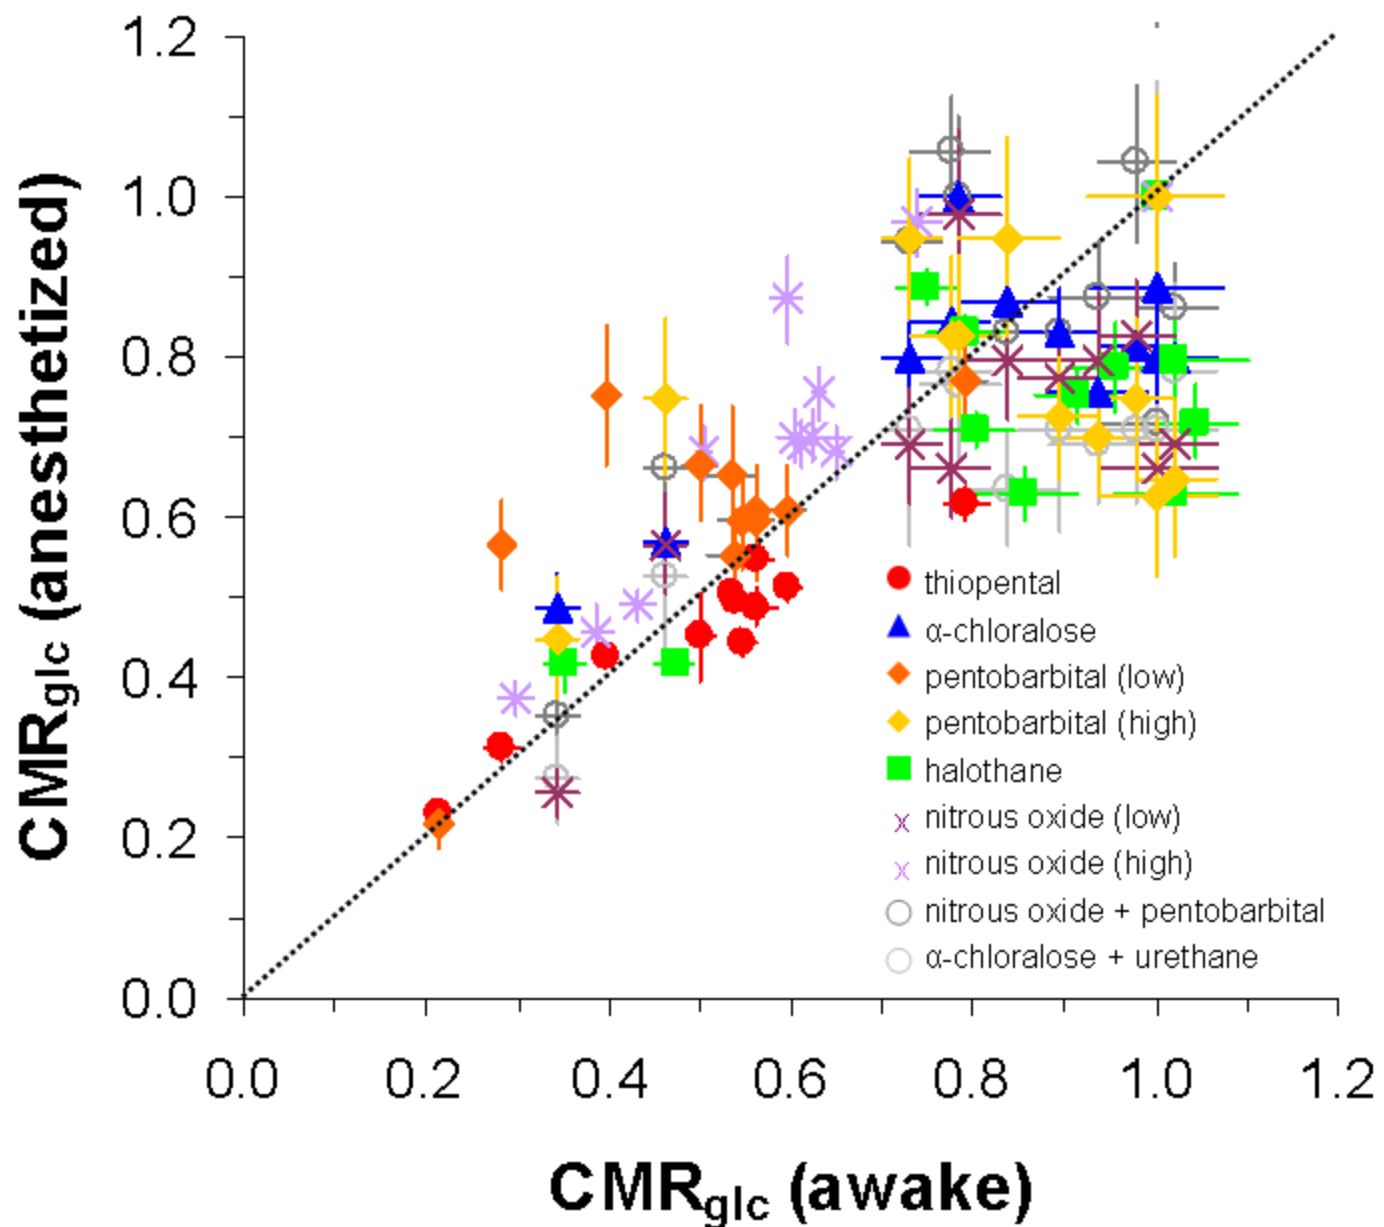

SI Figure 6

Supplement: supp_0709515104_09515Fig6.pdf [file supp_0709515104_09515Fig6.pdf]
